# Supplementary material
Source: PubMed Central journal article supplement (PMC3288433)
Supplement: NIHMS323961-supplement-Supp_Table_S1-S2___Fig_S1-S2.pdf [file NIHMS323961-supplement-Supp_Table_S1-S2___Fig_S1-S2.pdf]

| Pathological parameter | Score        |                                                    |                                                                    |                                                                                    |                                                                                         |
|------------------------|--------------|----------------------------------------------------|--------------------------------------------------------------------|------------------------------------------------------------------------------------|-----------------------------------------------------------------------------------------|
|                        | 0            | 1                                                  | 2                                                                  | 3                                                                                  | 4                                                                                       |
| <i>Steatosis</i>       | Normal liver | Micro-vesicular fat vesicles in hepatocytes (<10%) | Micro/macro-vesicular fat vesicles present in hepatocytes (10-30%) | Micro & macro-vesicular fat vesicles present in hepatocytes (> 30%)                | Macro-vesicular fat vesicles present in multiple zones, bridging between affected areas |
| <i>Necrosis</i>        | Normal liver | Individual, scattered necrotic cells               | Scattered necrotic cell clusters <10 cells                         | Scattered necrotic cell clusters >10 cells                                         | Multiple scattered necrotic cell clusters                                               |
| <i>Inflammation</i>    | Normal liver | Scattered inflammatory cells                       | Scattered small inflammatory cells, hepatocyte damage in 1-3 zones | Scattered small inflammatory cell collections, hepatocyte damage in multiple zones | Large, multiple scattered small inflammatory cell, extensive damage                     |
| <i>Fibrosis</i>        | Normal liver | 0-4%                                               | 5-9%                                                               | 10-14%                                                                             | >15%                                                                                    |

**Supplemental Table 1.** Pathological scoring criteria employed in blind scoring histology slides after H and E and Picrosirius red staining. Following complete scoring, individual scoring criteria were totaled and used to generate a total liver injury score (TLIS).

| Pathological parameter            | MALE (24 Wks)<br>Group (n) |                  |                  |                  | FEMALE (24 Wks)<br>Group (n) |                  |                  |                  |
|-----------------------------------|----------------------------|------------------|------------------|------------------|------------------------------|------------------|------------------|------------------|
|                                   | C (9)                      | E (9)            | D (9)            | D+E (14)         | C (10)                       | E (10)           | D (9)            | D+E (14)         |
| <i>Steatosis</i>                  | 0±0                        | 0.69±0.10        | 1.84±0.26        | 1.93±0.13        | 0±0                          | 0.39±0.05        | 1.37±0.08        | 1.35±0.14        |
| <i>Necrosis</i>                   | 0±0                        | 0.25±0.05        | 0.97±0.12        | 1.14±0.12        | 0±0                          | 0.14±0.02        | 0.51±0.10        | 0.45±0.05        |
| <i>Inflammation</i>               | 0.04±0.02                  | 0.14±0.05        | 0.80±0.18        | 1.01±0.13        | 0.03±0.02                    | 0.2±0.04         | 0.96±0.12        | 0.73±0.08        |
| <i>Fibrosis</i><br>(% sirius red) | 0.18±0.04                  | 0.46±0.20        | 0.57±0.15        | 0.68±0.13        | 0.20±0.06                    | 0.37±0.06        | 0.78±0.07        | 0.68±0.07        |
| <b>TLIS</b>                       | <b>.22±0.04</b>            | <b>1.54±0.15</b> | <b>4.18±0.51</b> | <b>4.75±0.32</b> | <b>0.23±0.07</b>             | <b>1.10±0.11</b> | <b>3.61±0.18</b> | <b>3.21±0.23</b> |
|                                   | MALE (48 Wks)<br>Group (n) |                  |                  |                  | FEMALE (48 Wks)<br>Group (n) |                  |                  |                  |
|                                   | C (9)                      | E (9)            | D (8)            | D+E (14)         | C (10)                       | E (10)           | D (9)            | D+E (14)         |
| <i>Steatosis</i>                  | 0.01±0.01                  | 0.93±0.17        | 1.76±0.27        | 3.00±0.13        | 0.01±0.01                    | 0.40±0.13        | 1.10±0.21        | 1.24±0.30        |
| <i>Necrosis</i>                   | 0.03±0.03                  | 0.31±0.08        | 0.93±0.06        | 2.19±0.16        | 0±0                          | 0.14±0.05        | 0.60±0.08        | 0.84±0.10        |
| <i>Inflammation</i>               | 0.10±0.04                  | 0.16±0.05        | 0.64±0.13        | 1.61±0.31        | 0.13±0.04                    | 0.40±0.14        | 0.89±0.10        | 1.63±0.31        |
| <i>Fibrosis</i><br>(% sirius red) | 0.20±0.01                  | 0.35±0.03        | 1.83±0.08        | 2.31±0.11        | 0.16±0.08                    | 0.44±0.12        | 1.37±0.07        | 1.51±0.13        |
| <b>TLIS</b>                       | <b>0.34±0.05</b>           | <b>1.75±0.25</b> | <b>5.16±0.29</b> | <b>9.11±0.54</b> | <b>0.30±0.12</b>             | <b>1.39±0.19</b> | <b>3.96±0.44</b> | <b>5.13±0.53</b> |

**Supplemental Table 2.** Mean pathological scores following blind scoring for steatosis, necrosis, inflammation and fibrosis in control male and female mice (C), and mice maintained on ethanol (E) DEN-initiated (D) or DEN-initiated followed by ethanol (D+E). Data were collected at 24 and 48 weeks and totaled to generate a total liver injury score (TLIS).

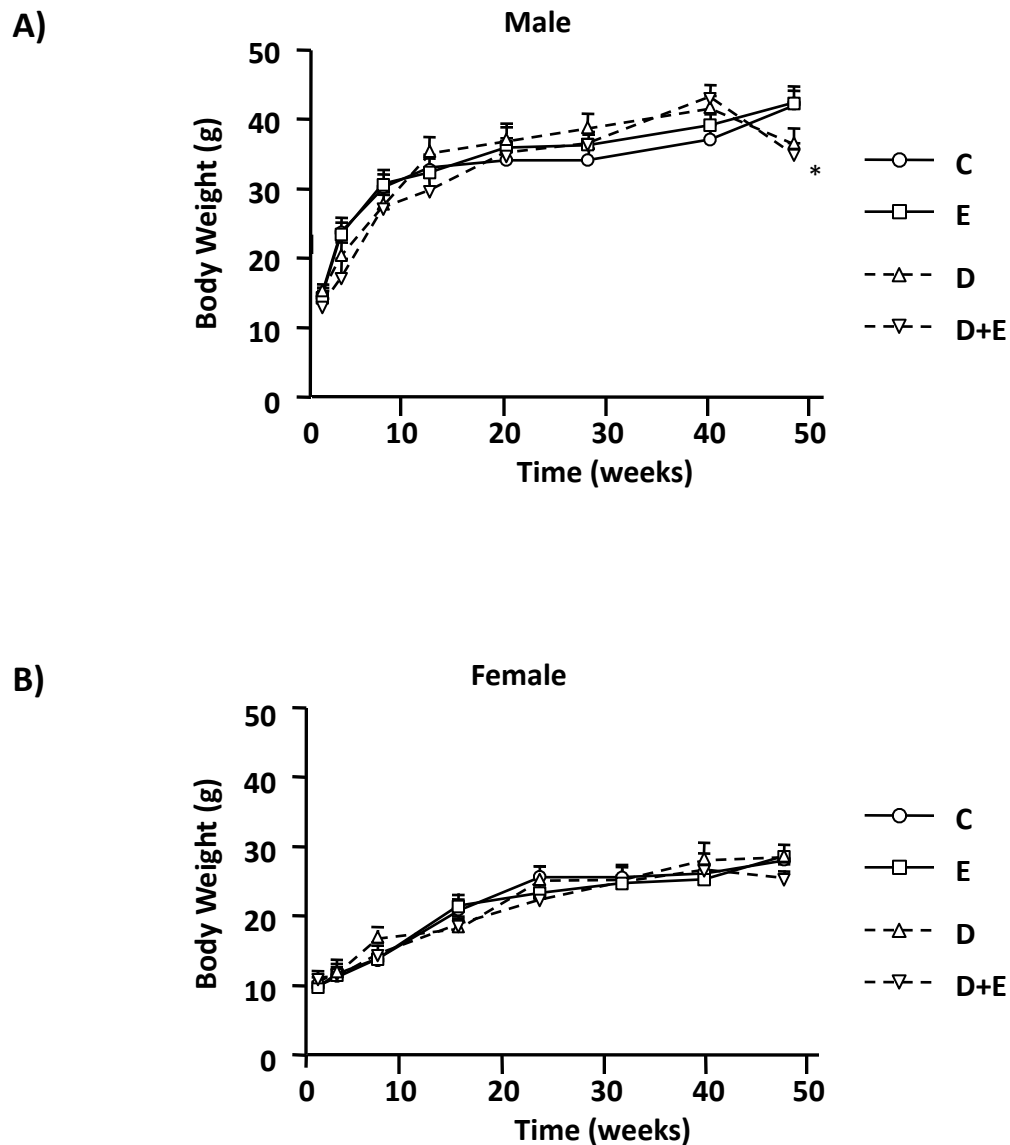

**Supplemental Figure 1. A)** Changes in body weight of control (C) male mice compared to those maintained on EtOH-DW (40-48-Wks; E), initiated with DEN (3-Wks; D) or initiated with DEN (3-Wks) followed by EtOH-DE (40-48-Wks; D+E). \* $p < 0.05$  48-Wks versus 40-Wks,  $n =$  minimum of 8/group). **B)** Changes in body weight of C female mice compared to E, D, or D+E).  $n =$  minimum of 8/group)

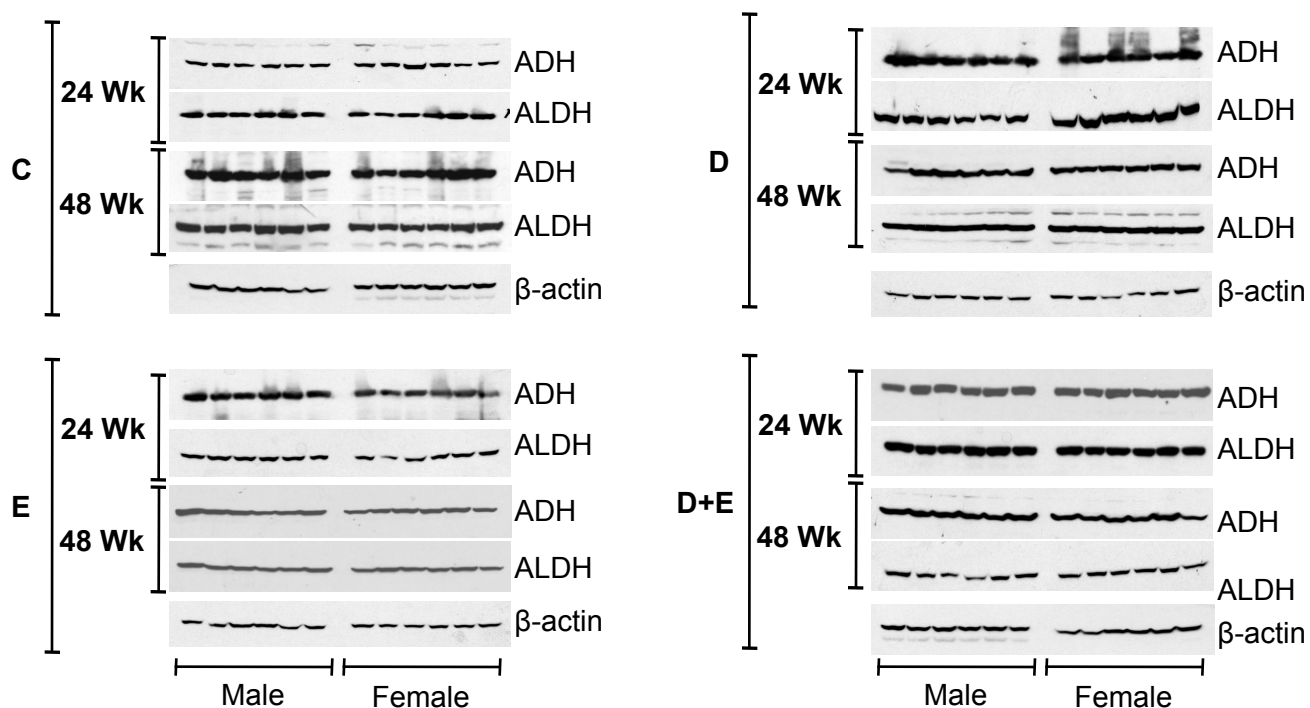

**Supplemental Figure 2.** Representative immunoblots of alcohol dehydrogenase (ADH) and aldehyde dehydrogenase (ALDH) expression in liver lysates from control (C) male and female mice compared to those maintained on EtOH-DW (E), initiated with DEN (D) or initiated with DEN followed by EtOH-DE (D+E). Each lane represents lysate from individual liver tissue sample resected at 24 or 48-wks. Equal sample loading was confirmed by stripping membranes and reprobing with an anti- $\beta$ -actin antibody.
